# Supplementary material for: Colloidal cobalt nanoparticles: a highly active and reusable Pauson-Khand catalyst.
Source: Royal Society of Chemistry journal article supplement (doi:10.1039/b107577m), 2001-10-11
Supplement: b107577mesi.doc [file b107577mesi.doc]

**Electronic Supplementary Information for:**

**Colloidal Cobalt Nanoparticles: A Highly Active and Reusable Pauson-Khand Catalyst**

Sang-Wook Kim,a Seung Uk Son,b Su Seong Lee, a

Taeghwan Hyeon* a and Young Keun Chung* b

**1**. **Experimental Details for the catalytic Pauson-Khand reactions**

In a typical reaction, the enyne shown in Equation 1 (0.10 g, 0.42 mmol) and colloidal cobalt nanoparticles (25 mg, 45 wt% cobalt) in 5 mL of THF was heated under CO pressure of 5 atm at 130C for 12 h. After the reaction mixture was cooled to room temperature, 5 mL of MeOH was added to get a black precipitate. The precipitated cobalt nanoparticles were removed by filtration. The final cyclopentenone product was obtained by column chromatography on a silica gel eluting with 10:1 volume ratio of hexane and diethyl ether. For the recycling experiments, the retrieved powder form of the cobalt nanoparticles was re-dispersed in THF and was applied as catalyst.

**2. Transmission electron micrographs (TEM) of colloidal cobalt nanoparticles before the reaction (a) and after running four reaction cycles (b).**


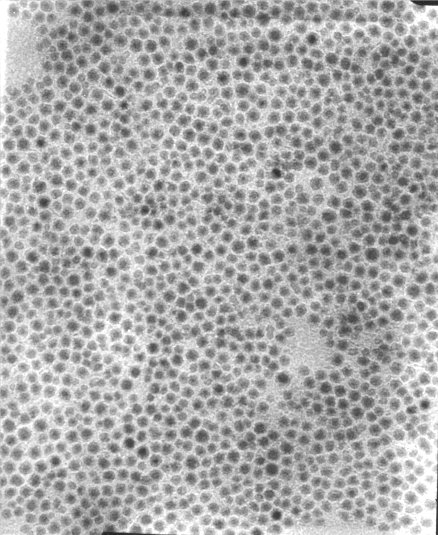


**20 nm**


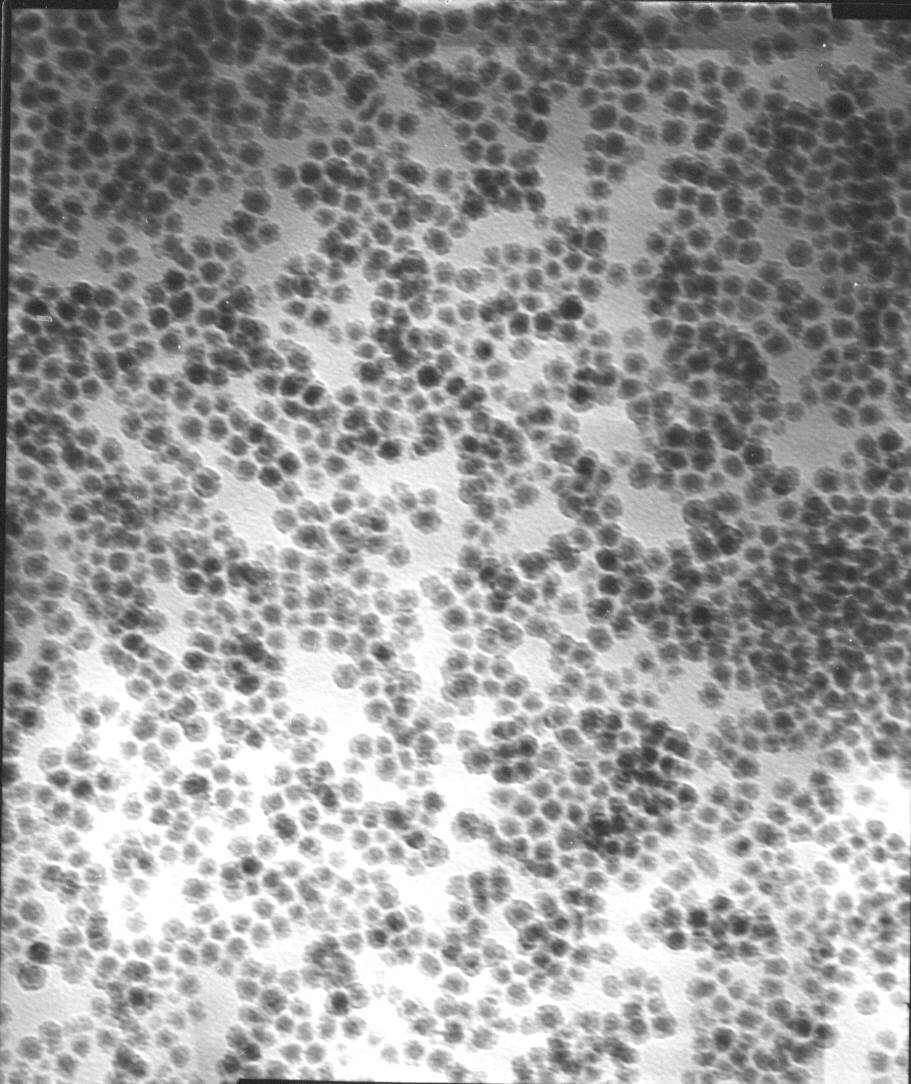


**20 nm**

**(a) (b)**
